# Supplementary material for: Bactogram: Spatial Analysis of Bacterial Colonization in Epidermal Wounds
Source: bioRxiv or medRxiv preprint supplement (doi:10.1101/2024.04.18.24305961), 2024-04-19

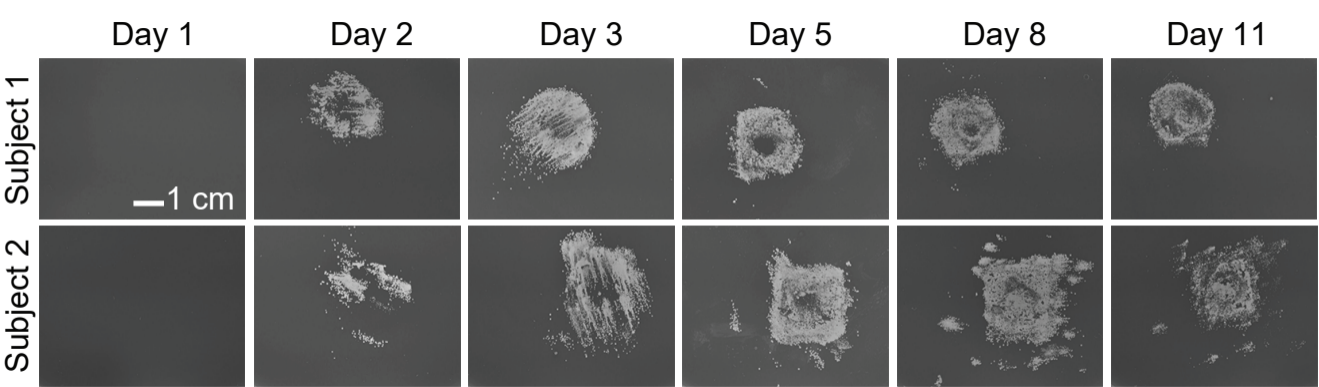

Supplement: Supplementary file [file media-6.pdf]
