# Supplementary material for: Bactogram: Spatial Analysis of Bacterial Colonization in Epidermal Wounds
Source: bioRxiv or medRxiv preprint supplement (doi:10.1101/2024.04.18.24305961), 2024-04-19

Are there visible edges from the dressing?

Yes

No

Align square to the edges

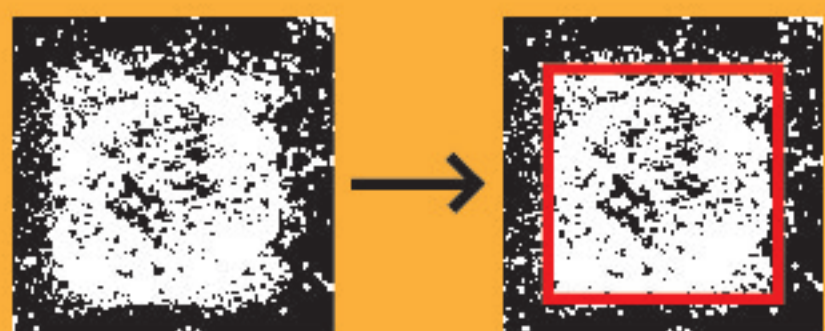

Can the wound be seen?

Yes

No

Center square around wound

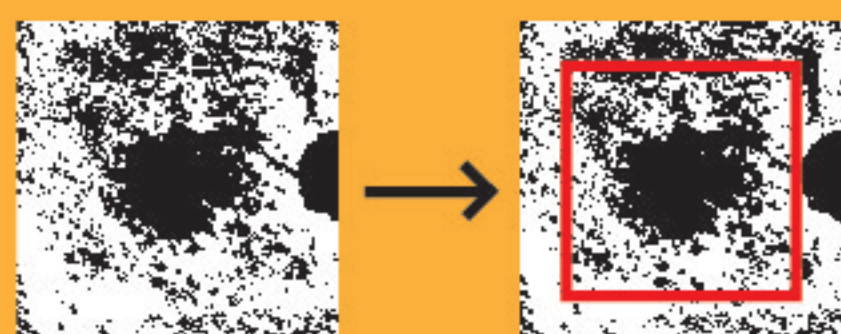

Approximate wound location and center square around approximation

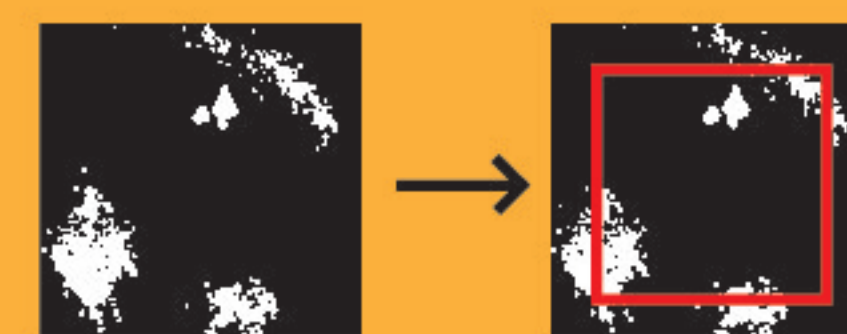

Supplement: Supplementary file [file media-8.pdf]
